# Supplementary material for: Accuracy of PET rCBF measurements: Effect of transit time delay
Source: MDPI journal article supplement (doi:10.3390/ijms24065836), 1984-01-01
Supplement: s1 [file s1]

## Supplementary Tables

**Table S1.** Patient Demographic and Surgical Methods of Persistent Fetal Vasculature of the Eye.

| Characteristic                   | Value                 |
|----------------------------------|-----------------------|
| Patients (Eyes)                  | 44 (51)               |
| Age at diagnosis, month (median) | 5.0 (range: 0.7-81.0) |
| Age at operation, month (median) | 6.0 (range: 0.7-82.0) |
| Male, n (%)                      | 26 (59.1)             |
| Laterality, Bilateral, n (%)     | 7 (15.9)              |
| Lesion eyes, n (%)               | 51                    |
| Right                            | 27 (52.9)             |
| Left                             | 24 (47.1)             |
| Surgical methods, n (%)          | n=38                  |
| PPV                              | 12 (31.6)             |
| PPL                              | 3 (7.9)               |
| PPV + PPL                        | 17 (44.7)             |
| PPV + PPL + IOL implant          | 2 (5.3)               |
| CE-IOL                           | 4 (10.5)              |

IOL: intraocular lens; CE-IOL: cataract extraction and IOL implantation; PPL: pars plicata lensectomy; PPV: pars plicata vitrectomy

**Table S2.** Ocular Parameters Associated with Poor Visual Outcomes in Patients with Persistent Fetal Vasculature of the Eye.

| Factors                         | Poor Vision<br>(worse than CF)<br>(n=20) | Favorable Vision<br>(CF and better than CF)<br>(n=19) | <i>p</i> value* |
|---------------------------------|------------------------------------------|-------------------------------------------------------|-----------------|
| Initial axial length, mm        |                                          |                                                       |                 |
| Mean                            | 16.6±3.0                                 | 21.0±1.8                                              | 0.001           |
| Median (Q1, Q3)                 | 17.5(13.8, 19.3)                         | 21.2 (19.2, 22.5)                                     |                 |
| Missing or unmeasurable         | 13                                       | 2                                                     |                 |
| Horizontal corneal diameter, mm |                                          |                                                       |                 |
| Mean                            | 10.5±1.0                                 | 10.8±0.8                                              | 0.126           |
| Median (Q1, Q3)                 | 10.5 (9.9, 11.0)                         | 11.0 (10.4, 11.4)                                     |                 |
| Missing or unmeasurable         | 2                                        | 1                                                     |                 |
| Vertical corneal diameter, mm   |                                          |                                                       |                 |
| Mean                            | 10.3±0.7                                 | 10.5±0.9                                              | 0.245           |
| Median (Q1, Q3)                 | 10.5 (10.0, 10.5)                        | 10.5 (10.0, 11.0)                                     |                 |
| Missing or unmeasurable         | 3                                        | 3                                                     |                 |

CF: counting fingers. \*Mann–Whitney *U* test

**Table S3.** Visual Outcomes for Persistent Fetal Vasculature of Previous Studies.

| Study (year)               | No. of eyes<br>undergoing surgery<br>and location | Median age<br>at surgery<br>(month) | Bilaterality | No. of eyes<br>with final<br>VA >20/400 | No. of eyes with<br>final VA > form<br>vision* | Mean follow<br>up duration<br>(month) |
|----------------------------|---------------------------------------------------|-------------------------------------|--------------|-----------------------------------------|------------------------------------------------|---------------------------------------|
| Sisk et al.<br>(2010)      | 26 anterior,<br>7 posterior,<br>37 combined       | 2.75                                | 3 (4.3%)     | 15 (21.4%)                              | 49 (70.0%)                                     | 47                                    |
| Liu et al.<br>(2017)       | 53 anterior,<br>16 posterior,<br>49 combined      | 22                                  | 13 (12.4%)   | 29 (24.6%)                              | Not reported                                   | 17                                    |
| Yeh et al.<br>(2019)       | 3 posterior,<br>22 combined                       | 15                                  | 8 (44.4%)    | 2 (8.0%)                                | 17 (68.0%)                                     | 41                                    |
| Khandwala<br>et al. (2021) | 4 anterior,<br>1 posterior,<br>41 combined        | 10.1                                | 1 (2.2%)     | 8 (17.4%)                               | 24 (52.2%)                                     | 33                                    |
| Current<br>study           | 11posterior,<br>40 combined                       | 6                                   | 7 (15.9%)    | 7 (13.7%)                               | 19 (37.3%)                                     | 68                                    |

VA: visual acuity

\* Form vision: VA of counting fingers, 'central, steady, and maintained', 'fix-and-follow', or better
